# Supplementary material for: Zoonotic Mutation of Highly Pathogenic Avian Influenza H5N1 Virus Identified in the Brain of Multiple Wild Carnivore Species
Source: MDPI journal article supplement (doi:10.3390/pathogens12020168), 2023-01-20
Supplement: s1 [file s1]

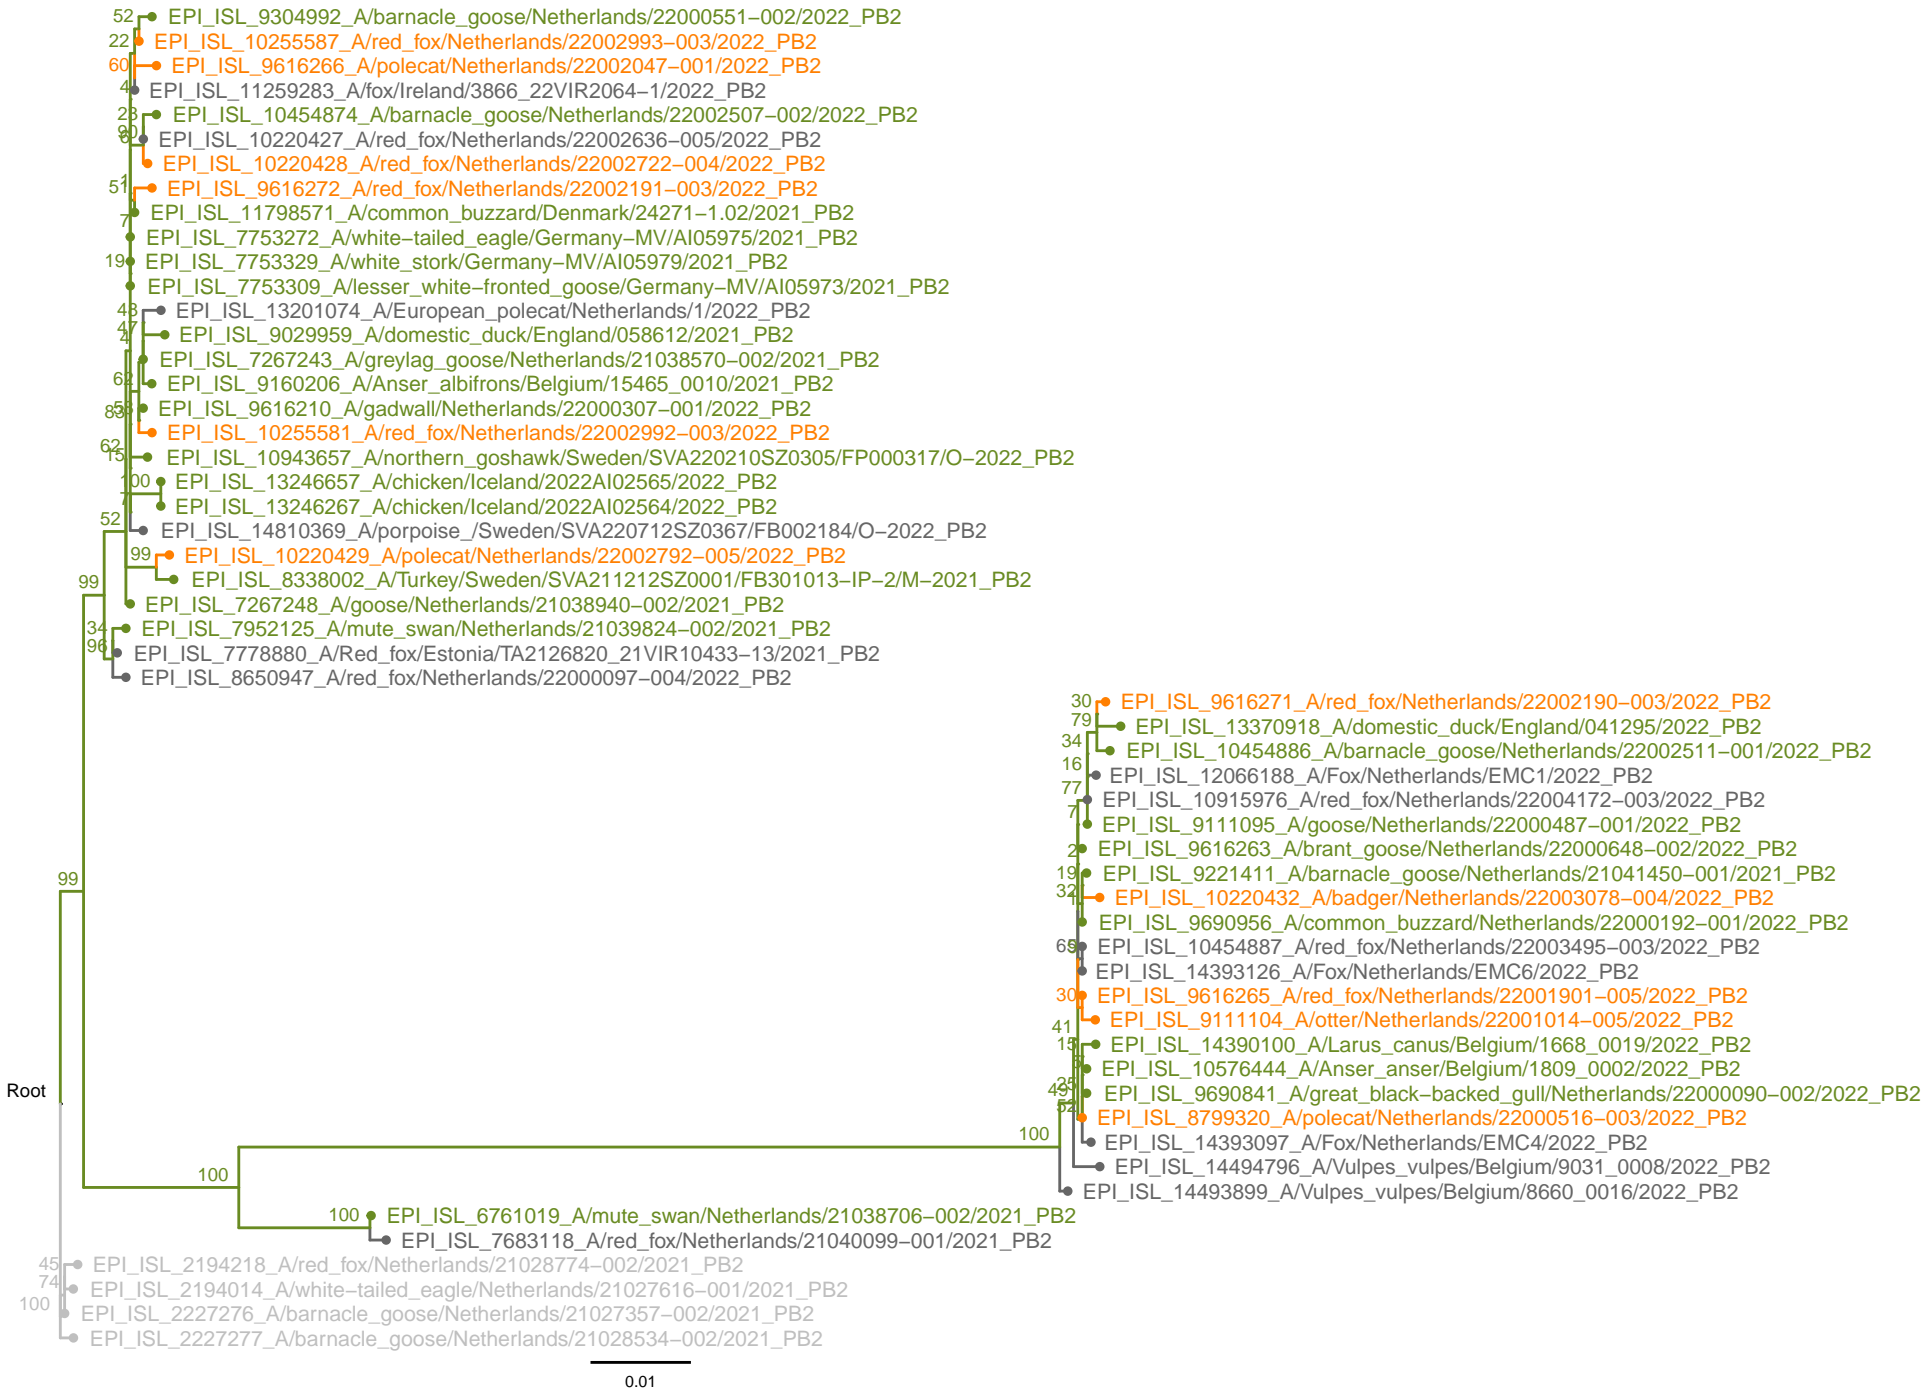

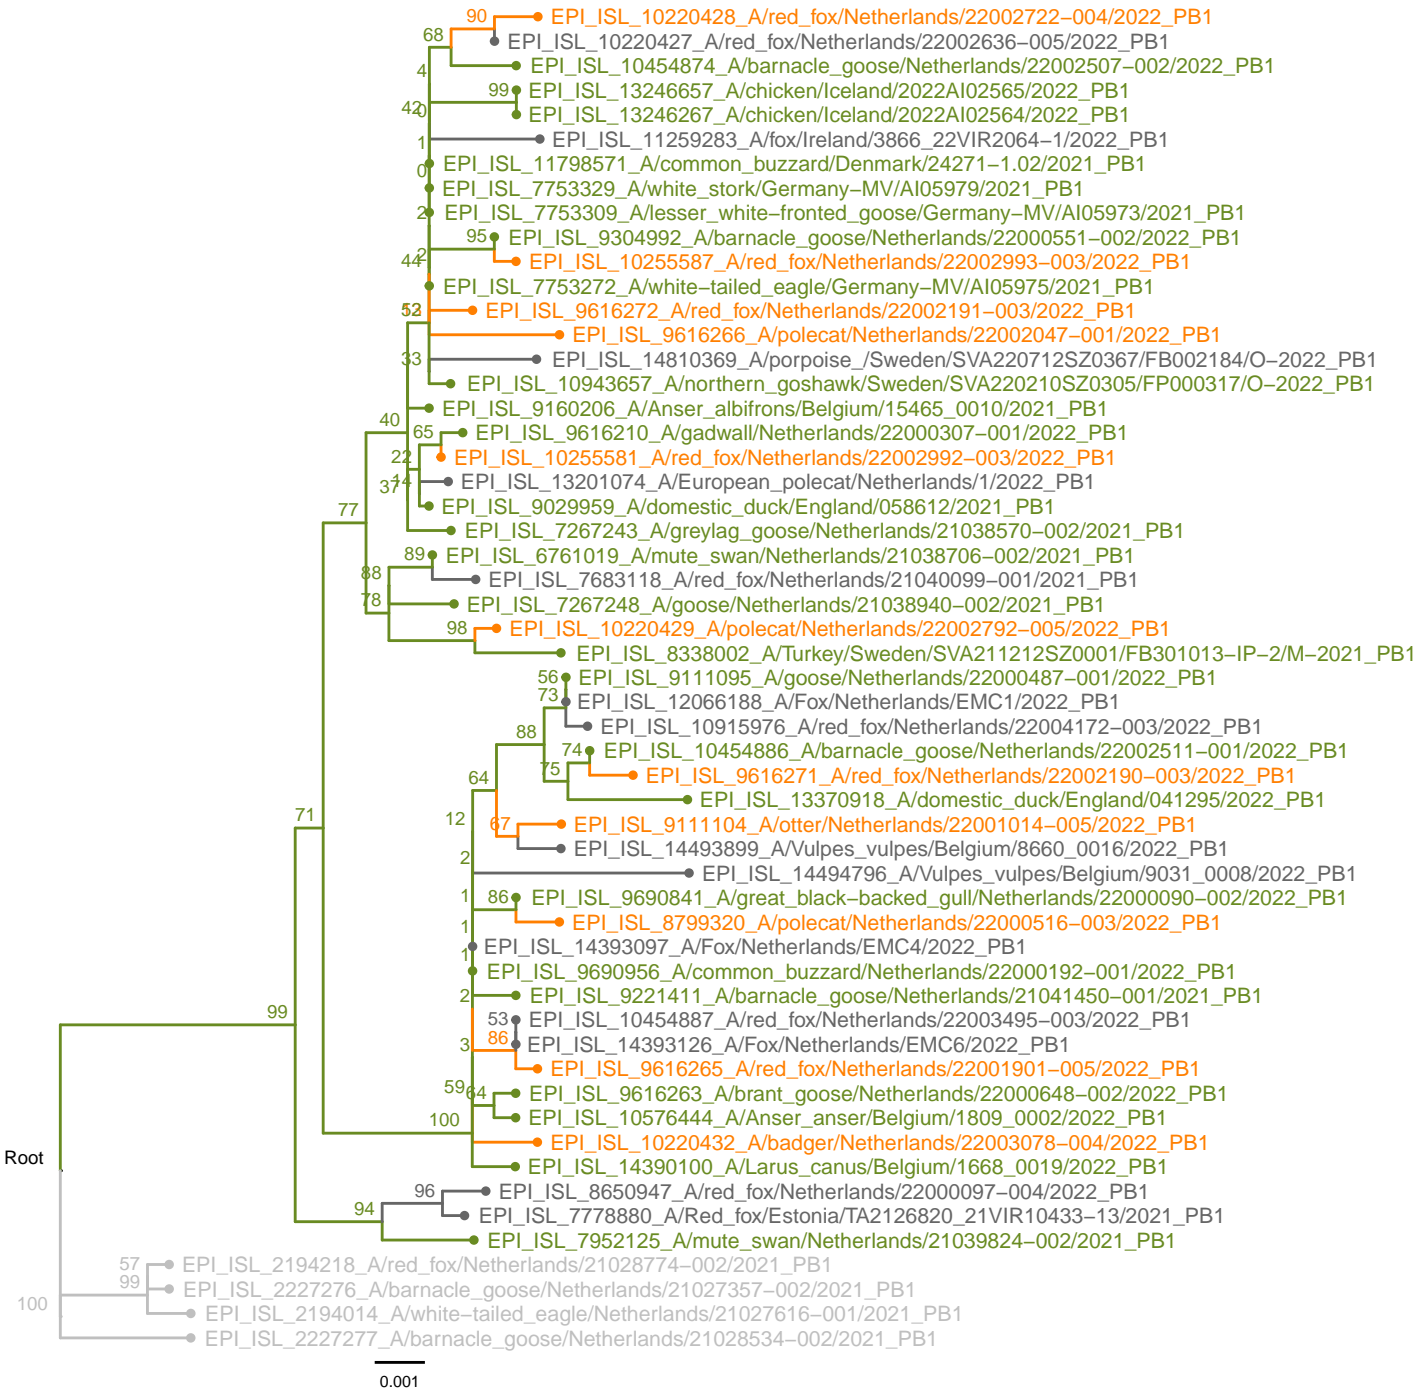

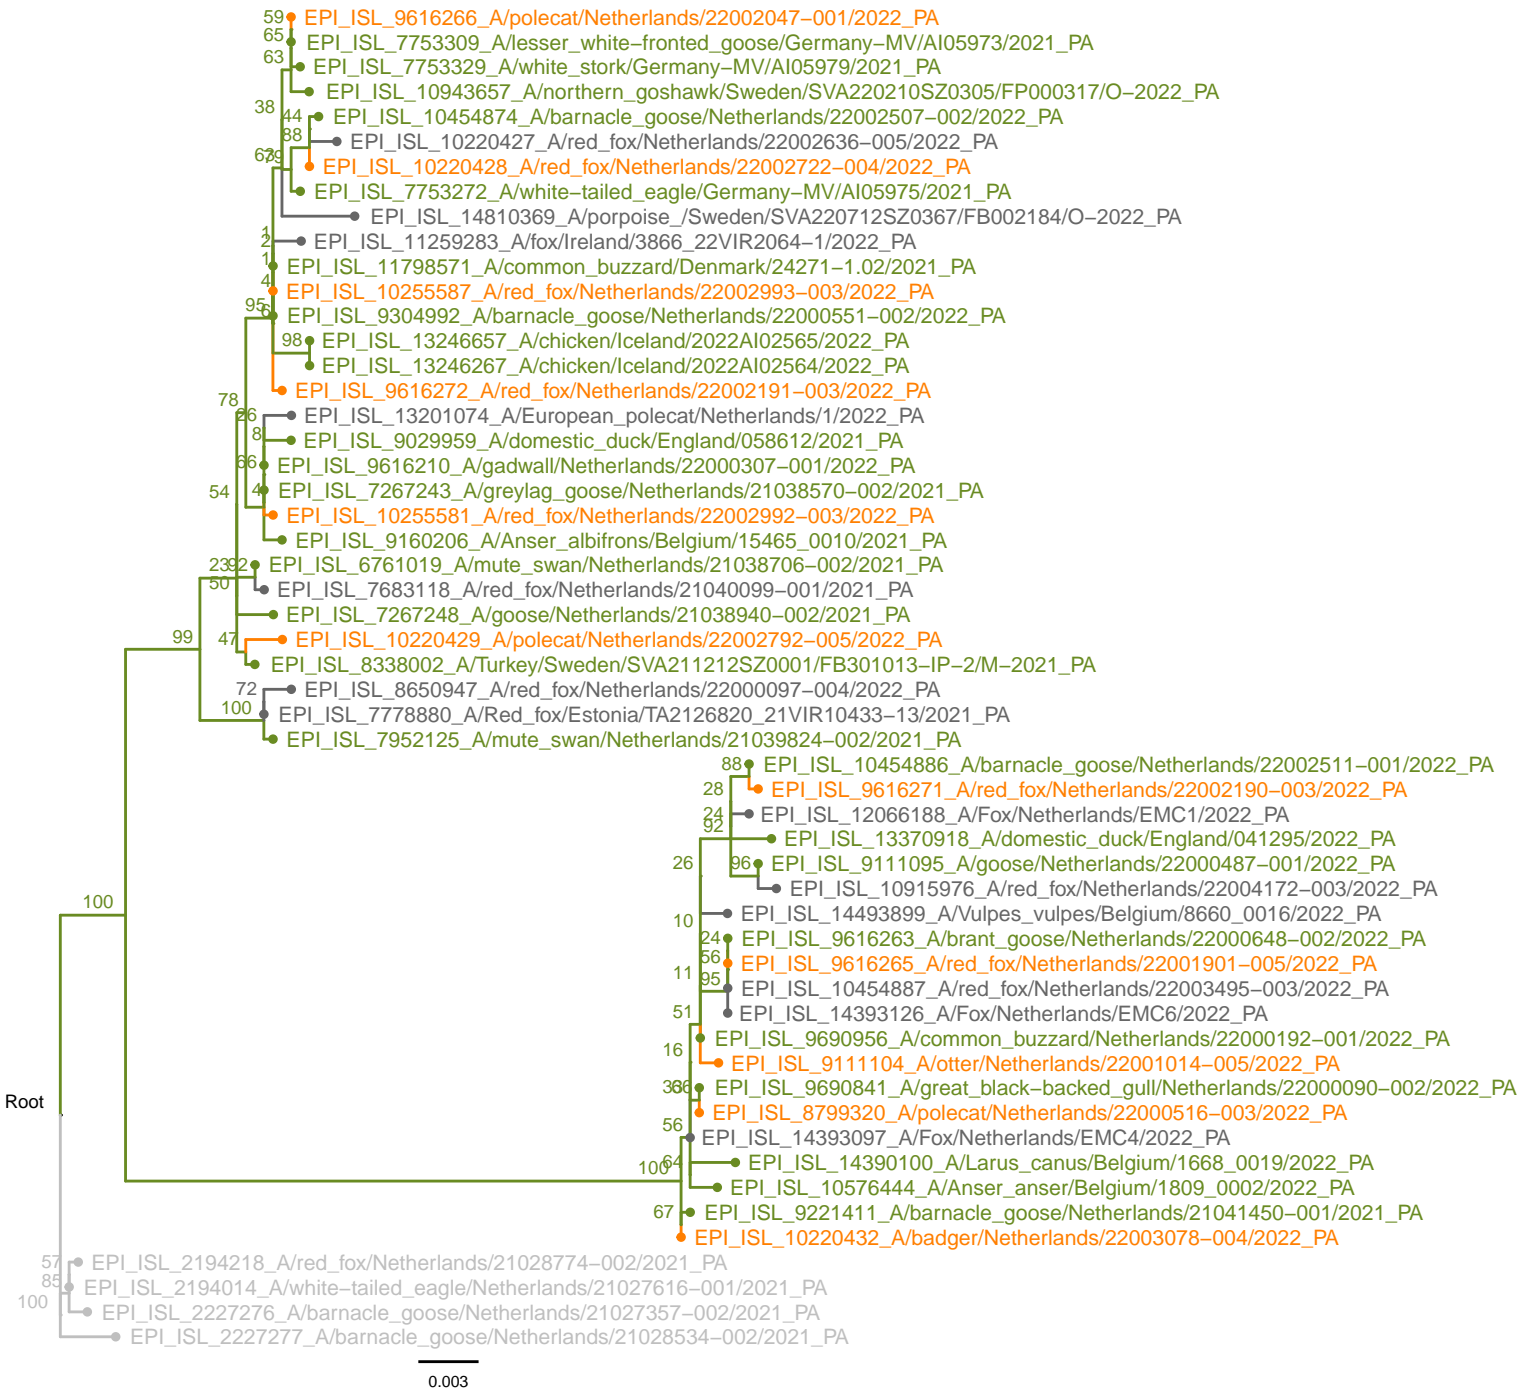

➡ Mammals 2021-2022 current study   ➡ Other mammals 2021-2022   ➡ Wild birds 2021-2022   ➡ Season 2020-2021

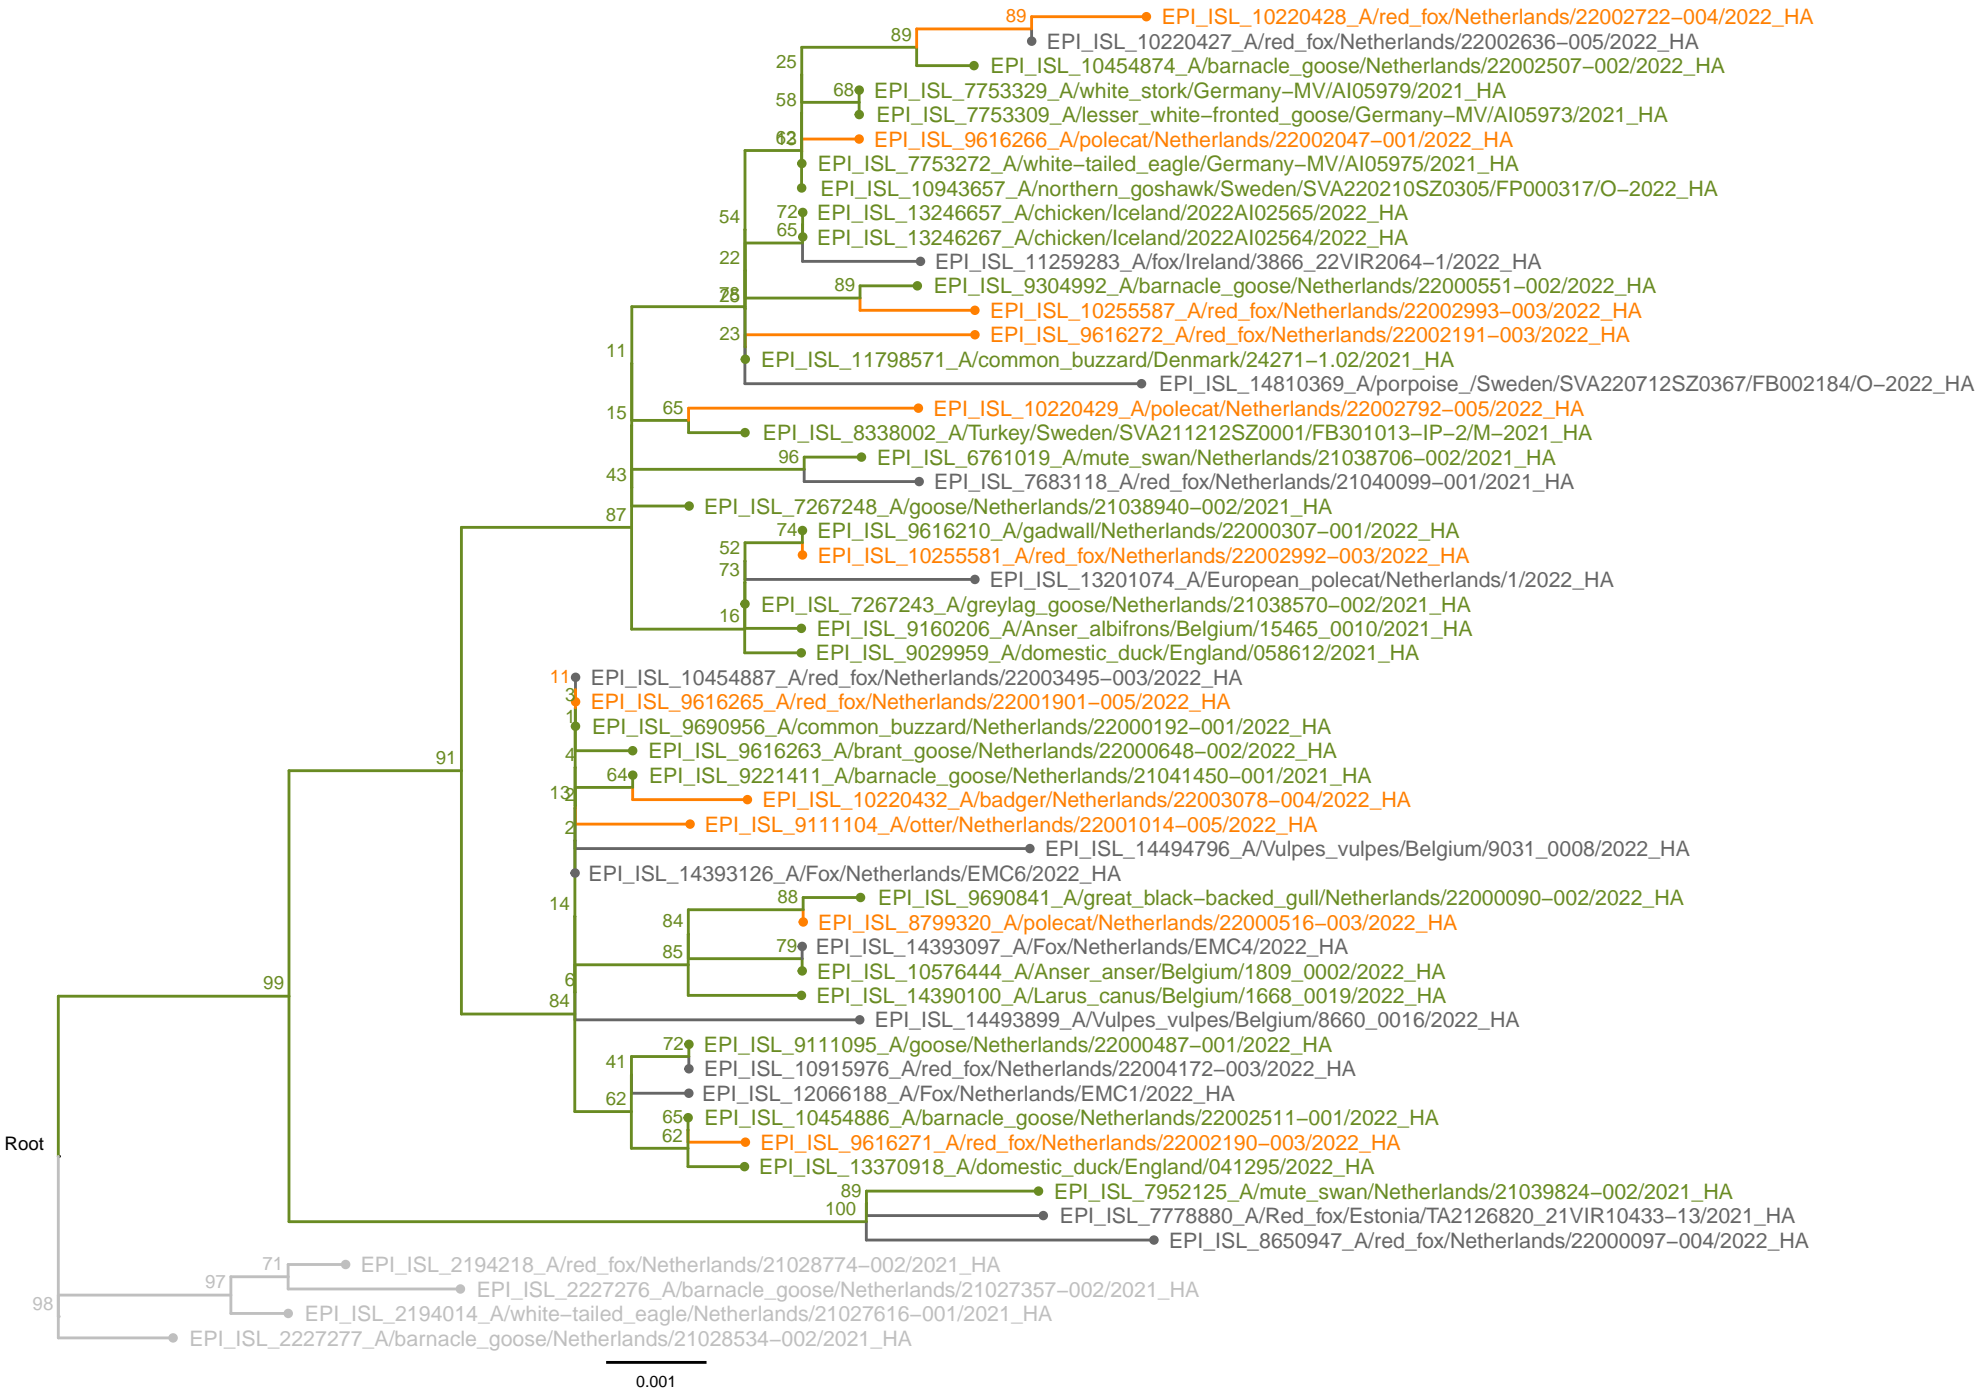

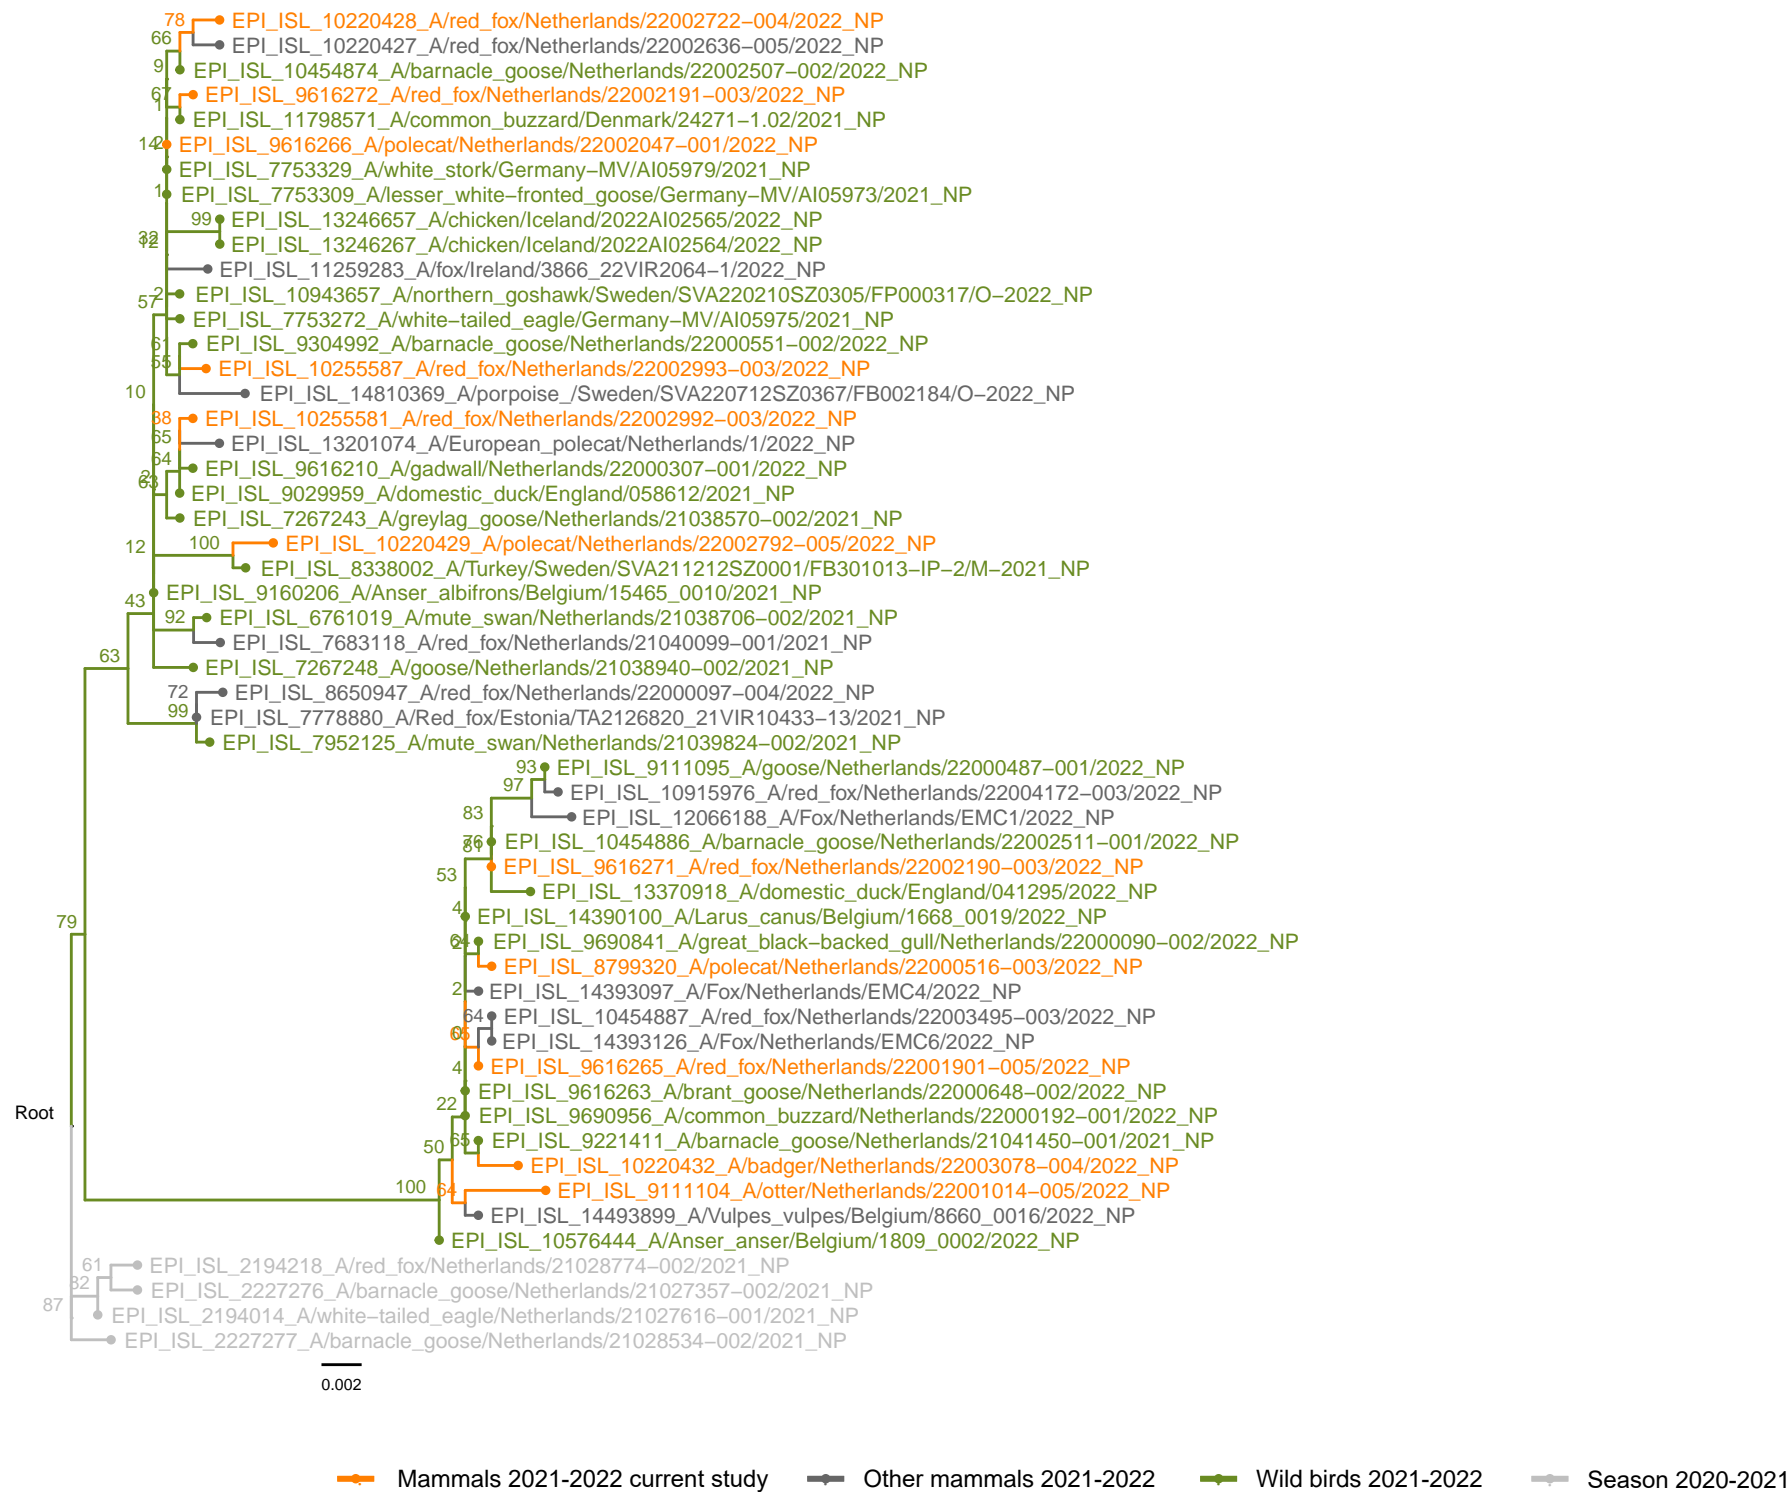

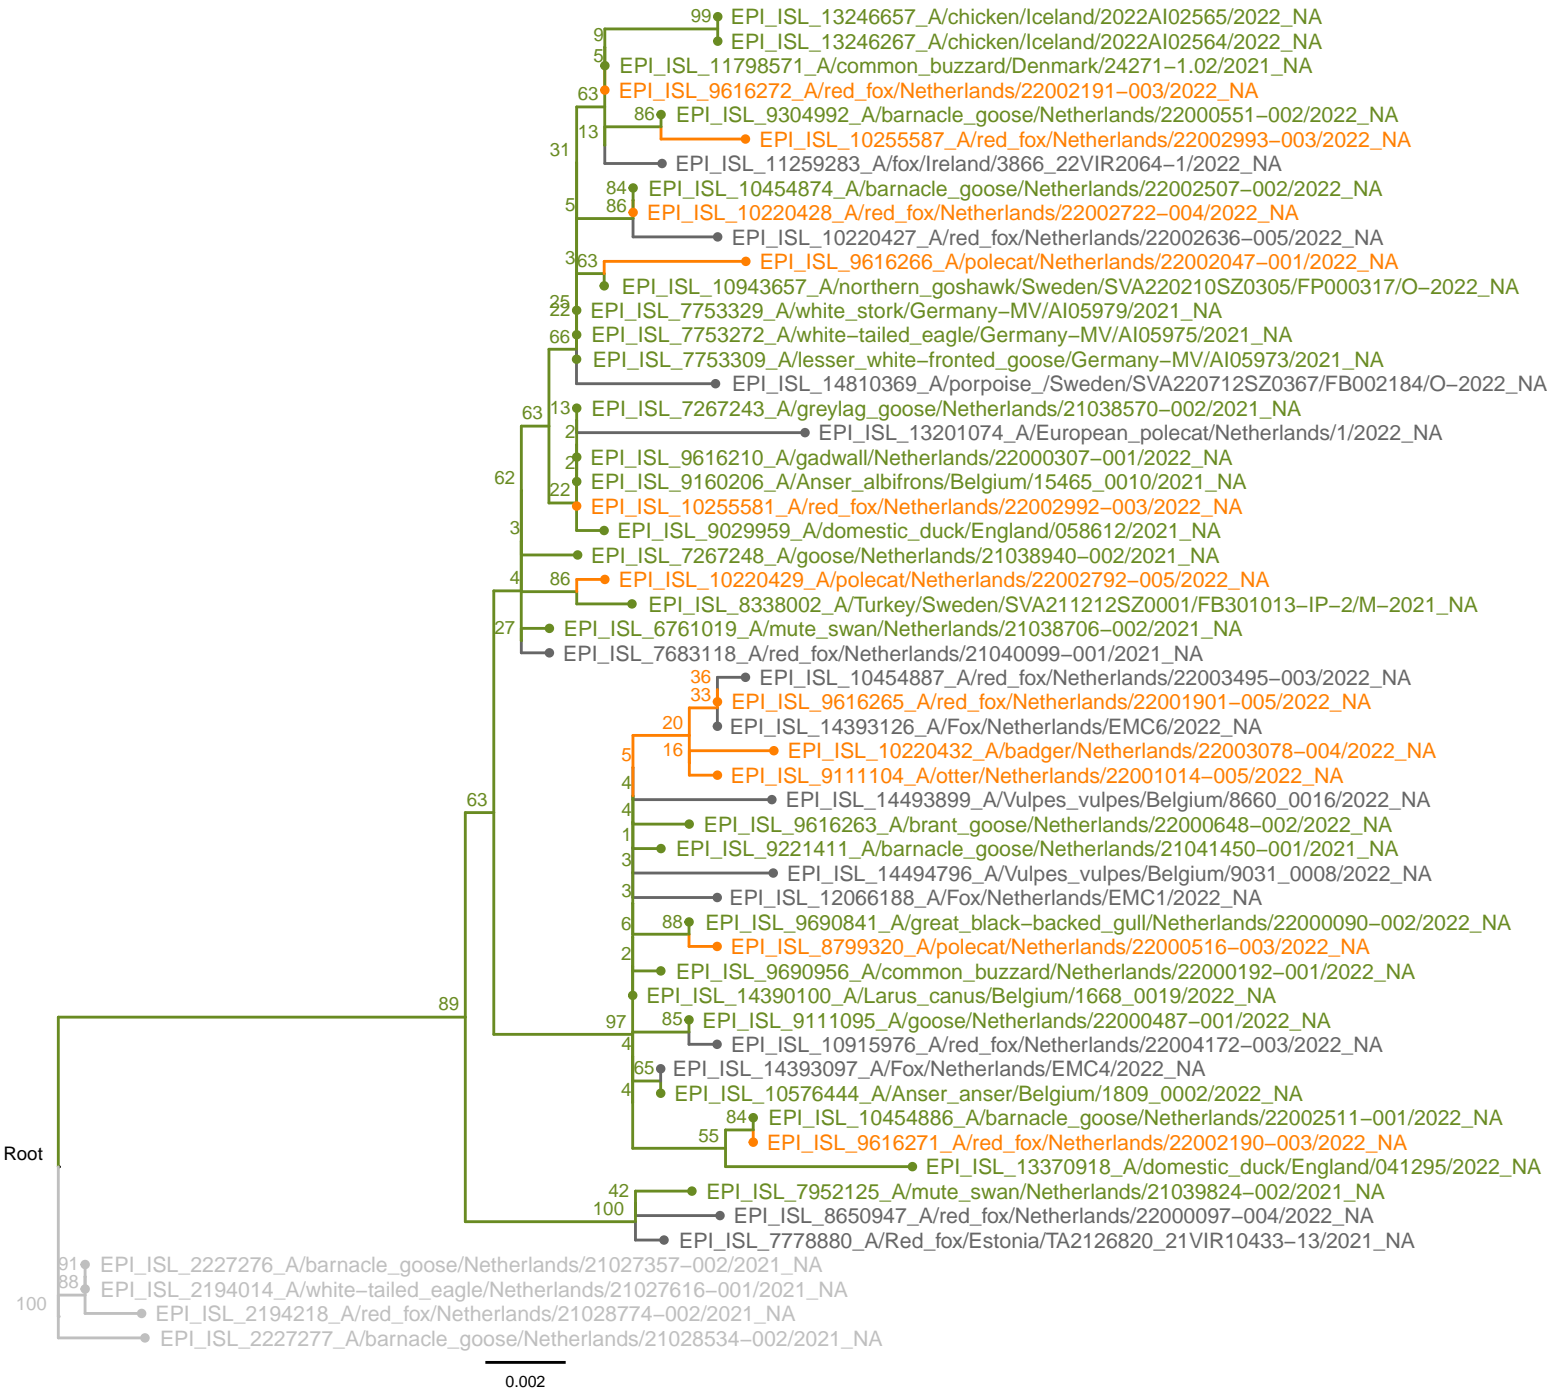



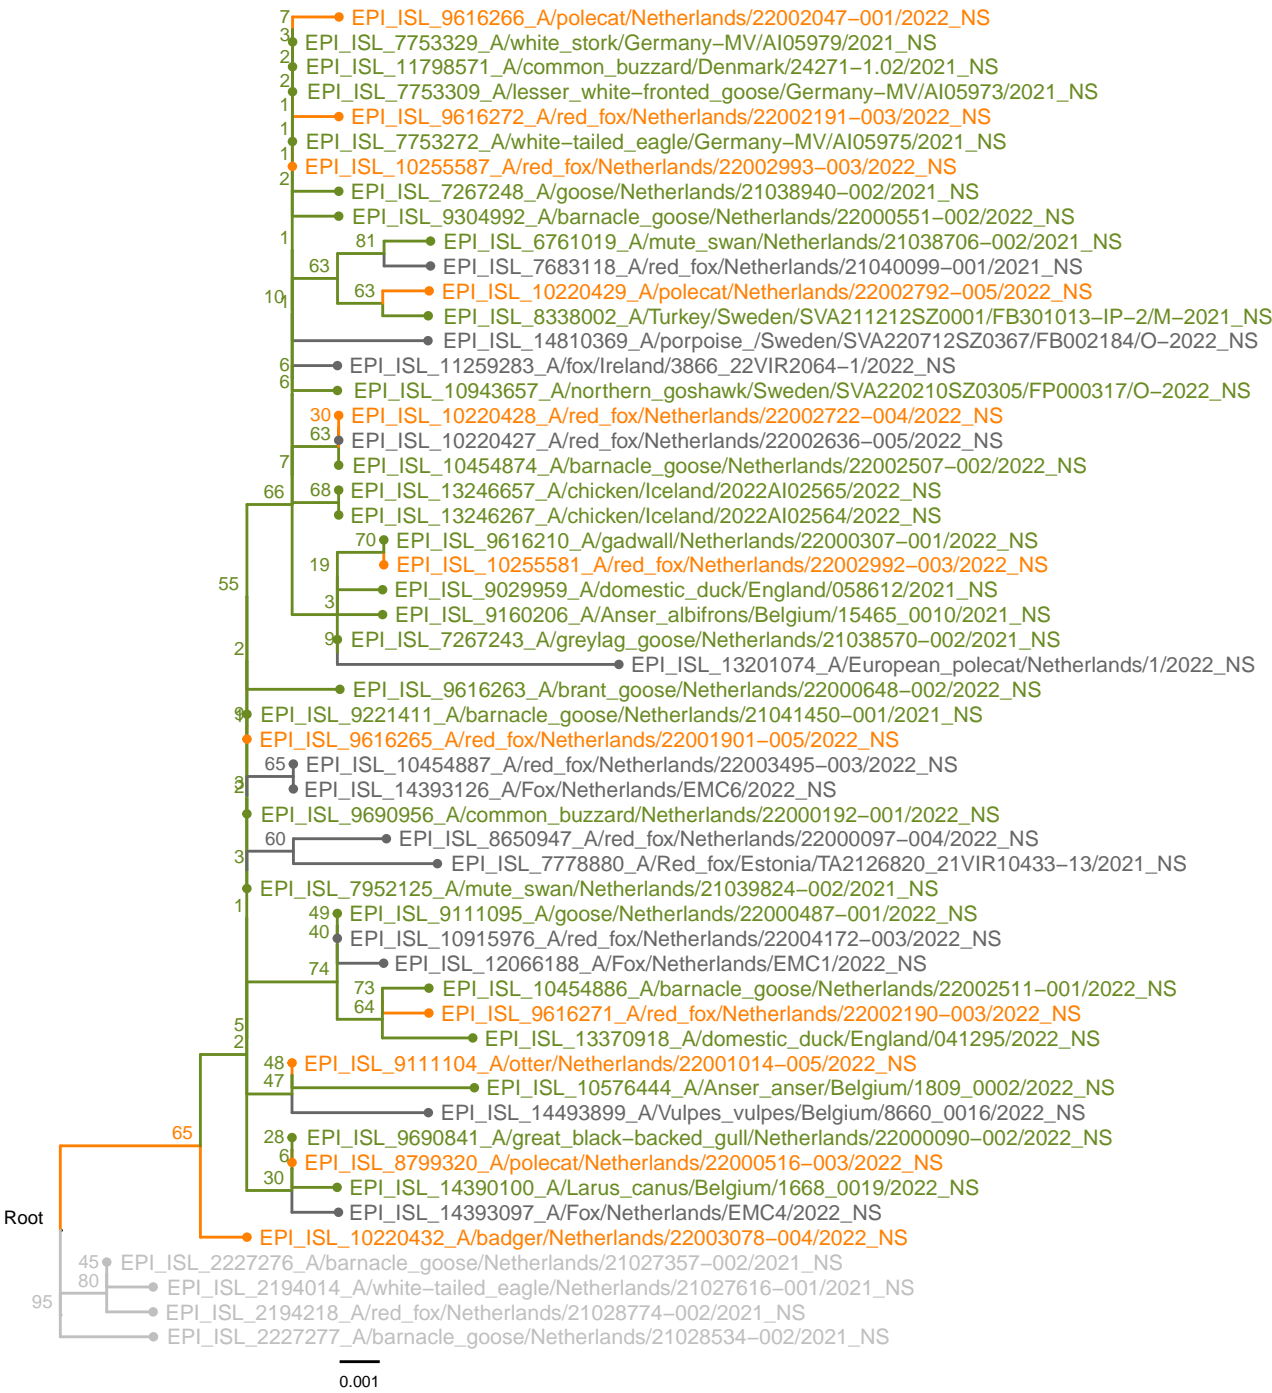

— Mammals 2021-2022 current study — Other mammals 2021-2022 — Wild birds 2021-2022 — Season 2020-2021
